# Supplementary material
Source: HighWire-hosted journal article supplement (https://bmjopen.bmj.com/content/15/3/e084735)
Supplement: inline-supplementary-material-1 [file inline-supplementary-material-1.pdf]

Study of regulatory communication and risk awareness following the Article 31 referral of Combined Hormonal Contraceptives in relation to thromboembolism

Semi-Structured Interview Topic Guide –  
Professionals Version  
(V1.1, UK/2017)

Instructions

Preparation: Make sure the setting is private and quiet and that both you and the participant are comfortable.

Materials:

- This protocol, including the Socio-demographics form
- Audio recording equipment
- Patient information sheet and consent form

Label notes & recorded file: Your notes and the file with the recorded interview should be labelled as following: participant’s initials and participant number; date of interview; your name; and location of interview.

Interview Strategy: This interview is meant to be an empathic conversation between you and the participant. It is best to start with an open-ended/relatively unstructured approach, and only impose structure if needed or the participant’s answers become off-topic.

•Ask the participant to provide as many details as possible, using probes such as “anything else?”, “is there anything else you would like to add?”.

Introduction for the participant: The statement below includes the information that should be shared with participants prior to the interview and one example of how it can be verbalized.

“To facilitate our note-taking, our conversation will be audio-recorded. Only our research team will have access to the recordings, which will be destroyed after they are transcribed.

We encourage you not to mention any personal information during our conversation, but should you do so, we will remove it from the transcripts.

Before we start our conversation, it is important you take some time to read the participation information sheet. You may ask anything you want about the study and what your participation involves. If you agree with everything, we will ask you to sign a consent form confirming that you have accepted to participate in the study and understand what the study is about.

We would like to reassure you that your participation is completely voluntary. You are free to withdraw from our conversation at any time without any justification.

PARTICIPANT ID

DATE

Whatever information you share with us will remain strictly confidential and will not be shared with any other party.

We have planned this interview to last approximately 30 minutes. During this time, we have several topics that we would like to cover, but you are free to provide any information you wish.”

PARTICIPANT ID

DATE

Interview Schedule

“There are currently thousands of women in the UK and abroad who have been prescribed with the pill but we do not how and why people make that choice. During this conversation, we will talk about what you think about this and your experience as a prescriber of this medicine.”

- 1. Which information sources do you use to advise women regarding contraceptive choice?
- 2. How do you provide this information to women?
  - E.g. Verbal conversation
  - Leaflets
  - Internet
- 3. Awareness about other information sources used by colleagues and which ones do colleagues use?
- 4. Have you received specific training on how to advise women about contraceptive choices?
  - Who was the training provider
  - Last training received
- 5. Have you participated in any continuing professional development initiatives/training courses regarding contraceptives and, if yes, if these were sought by you or promoted by others (who)?
- 6. How do continuing professional development initiatives and updates to information influence your practice?
- 7. Which regulators documents do you tend to rely on to advise women about contraceptives?
- 8. Have you ever received advice from regulators about contraceptives, how frequently and in which format?
- 9. How would you like to receive information from regulators about updates to contraceptives?

(Stop the recording before moving to next section).

PARTICIPANT ID

DATE

“Thank you for your time and help. Before we end the interview, we would just like to ask you some general questions for our statistics.”

Socio-demographics form

(To be completed by the researcher)

Age

- 1. Under 18 years old
- 2. 18-24 years old
- 3. 25-34 years old
- 4. 35-44 years old
- 5. 45-54 years old
- 6. 55-64 years old
- 7. 65-74 years old
- 8. 75 years or older

Gender

- 1. Male
- 2. Female

Ethnicity

\*adapted from the Office for National Statistics (v3.3, May 2015)

- 1. White
  - a. English/ Welsh/ Scottish/ Northern Irish/ British
  - b. Irish
  - c. Gypsy, Traveller or Irish Traveller
  - d. Any other White background
- 2. Mixed/ Multiple ethnic groups
  - a. White and Black Caribbean
  - b. White and Black African
  - c. White and Asian
  - d. Any other Mixed/ Multiple ethnic background
- 3. Asian/ Asian British
  - a. Indian
  - b. Pakistani
  - c. Bangladeshi

PARTICIPANT IDDATE

- d. Chinese
  - e. Any other Asian background
- 4. Black/ African/ Caribbean/ Black British
  - a. African
  - b. Caribbean
  - c. Any other Black/ African/ Caribbean background
- 5. Other ethnic group
  - a. Arab
  - b. Any other ethnic group

**Type of practitioner**

- 1. Nurse
- 2. Doctor
- 3. Other
  - a. Please specify

**Years of clinical practice**

- 1. Number of years prescribing contraceptives \_\_\_\_\_

**Type of current service**

- 1. General practice
- 2. Family planning clinic
- 3. Sexual health clinic
- 4. Private practice
- 5. Other
  - a. Please specify \_\_\_\_\_

**Location of current practice**

- 1. Urban
- 2. Suburban
- 3. Rural

PARTICIPANT ID

DATE
